# Supplementary material for: Longitudinal Monitoring of Alpha-Fetoprotein by Dried Blood Spot for Hepatoblastoma Screening in Beckwith–Wiedemann Syndrome
Source: PubMed Central journal article supplement (PMC6356556; doi:10.3390/cancers11010086), 2019-01-14
Supplement: cancers-11-00086-s001.pdf [file cancers-11-00086-s001.pdf]

## Longitudinal Monitoring of Alpha-Fetoprotein by Dried Blood Spot for Hepatoblastoma Screening in Beckwith–Wiedemann Syndrome

Alessandro Mussa, Valentina Pia Ciuffreda, Pina Sauro, Veronica Pagliardini, Severo Pagliardini, Diana Carli, Jennifer M. Kalish, Franca Fagioli, Enza Pavanello and Giovanni Battista Ferrero

Table S1. Raw data of paired measurements of alpha-fetoprotein ( $\alpha$ FP) with traditional and dried blood spot (DBS) method.

| Case ID | Patient ID | Condition/Diagnosis             | Sample | Age (Months) | Plasma $\alpha$ FP | DBS $\alpha$ FP |
|---------|------------|---------------------------------|--------|--------------|--------------------|-----------------|
| 1       | HE1        | Hepatoblastoma                  | 1      | 31.4         | 538.0              | 601.0           |
| 2       | UO1        | Undiagnosed Overgrowth          | 1      | 21.5         | 4.5                | 1.3             |
| 3       | UO1        | Undiagnosed Overgrowth          | 2      | 29.5         | 5.3                | 2.6             |
| 4       | BWS1       | Beckwith-Wiedemann              | 1      | 14.4         | 16.4               | 12.4            |
| 5       | BWS1       | Beckwith-Wiedemann              | 2      | 17.4         | 5.5                | 1.2             |
| 6       | BWS1       | Beckwith-Wiedemann              | 3      | 20.4         | 6.9                | 2.0             |
| 7       | BWS1       | Beckwith-Wiedemann              | 4      | 23.4         | 4.2                | 0.6             |
| 8       | BWS1       | Beckwith-Wiedemann              | 5      | 26.5         | 3.6                | 2.8             |
| 9       | BWS1       | Beckwith-Wiedemann              | 6      | 29.9         | 1.5                | 0.9             |
| 10      | BWS1       | Beckwith-Wiedemann              | 7      | 32.9         | 1.9                | 2.1             |
| 11      | BWS2       | Beckwith-Wiedemann              | 1      | 102.6        | 0.7                | 0.1             |
| 12      | ILO1       | Isolated Lateralized Overgrowth | 1      | 141.0        | 0.9                | 0.5             |
| 13      | BWS3       | Beckwith-Wiedemann              | 1      | 1.5          | 9544.0             | 8945.0          |
| 14      | BWS3       | Beckwith-Wiedemann              | 2      | 2.5          | 702.0              | 740.0           |
| 15      | BWS3       | Beckwith-Wiedemann              | 3      | 4.8          | 28.5               | 15.5            |
| 16      | BWS3       | Beckwith-Wiedemann              | 4      | 9.0          | 3.9                | 4.1             |
| 17      | BWS4       | Beckwith-Wiedemann              | 1      | 5.5          | 137.0              | 133.0           |
| 18      | BWS4       | Beckwith-Wiedemann              | 2      | 8.3          | 44.9               | 44.6            |
| 19      | BWS4       | Beckwith-Wiedemann              | 3      | 11.9         | 7.7                | 9.3             |
| 20      | ILO2       | Isolated Lateralized Overgrowth | 1      | 110.3        | 1.8                | 0.4             |

|    |       |                                              |   |       |         |         |
|----|-------|----------------------------------------------|---|-------|---------|---------|
| 21 | BWS5  | Beckwith-Wiedemann                           | 1 | 152.9 | 2.2     | 0.7     |
| 22 | UO2   | Undiagnosed Overgrowth                       | 2 | 52.8  | 0.6     | 0.4     |
| 23 | UO2   | Undiagnosed Overgrowth                       | 1 | 41.1  | 1.4     | 0.1     |
| 24 | MCM1  | Macrocephaly-Capillary Malformation Syndrome | 1 | 21.5  | 4.2     | 0.9     |
| 25 | MCM1  | Macrocephaly-Capillary Malformation Syndrome | 2 | 25.6  | 2.7     | 0.9     |
| 26 | BWS6  | Beckwith-Wiedemann                           | 1 | 81.3  | 5.7     | 1.2     |
| 27 | ILO3  | Isolated Lateralized Overgrowth              | 1 | 39.6  | 1.8     | 1.2     |
| 28 | ILO3  | Isolated Lateralized Overgrowth              | 2 | 47.4  | 1.3     | 1.2     |
| 29 | ILO3  | Isolated Lateralized Overgrowth              | 3 | 52.9  | 2.0     | 1.8     |
| 30 | UO3   | Undiagnosed Overgrowth                       | 1 | 79.6  | 1.3     | 0.1     |
| 31 | UO3   | Undiagnosed Overgrowth                       | 2 | 82.6  | 1.8     | 0.1     |
| 32 | UO3   | Undiagnosed Overgrowth                       | 3 | 87.7  | 2.1     | 0.1     |
| 33 | UO3   | Undiagnosed Overgrowth                       | 4 | 91.9  | 2.6     | 0.3     |
| 34 | ILO4  | Isolated Lateralized Overgrowth              | 1 | 14.6  | 6.6     | 1.5     |
| 35 | BWS7  | Beckwith-Wiedemann                           | 1 | 4.6   | 152.0   | 222.0   |
| 36 | BWS7  | Beckwith-Wiedemann                           | 2 | 13.0  | 11.5    | 4.1     |
| 37 | BWS7  | Beckwith-Wiedemann                           | 3 | 21.1  | 3.4     | 2.3     |
| 38 | BWS7  | Beckwith-Wiedemann                           | 4 | 23.9  | 1.2     | 0.5     |
| 39 | BWS7  | Beckwith-Wiedemann                           | 5 | 27.6  | 2.8     | 4.4     |
| 40 | BWS8  | Beckwith-Wiedemann                           | 1 | 138.3 | 2.1     | 2.2     |
| 41 | BWS9  | Beckwith-Wiedemann                           | 1 | 55.0  | 1.7     | 0.1     |
| 42 | BWS10 | Beckwith-Wiedemann                           | 1 | 67.6  | 1.9     | 5.5     |
| 43 | MCM2  | Macrocephaly-Capillary Malformation Syndrome | 1 | 3.0   | 187.1   | 168.0   |
| 44 | UO4   | Undiagnosed Overgrowth                       | 1 | 23.2  | 0.9     | 0.7     |
| 45 | UO4   | Undiagnosed Overgrowth                       | 2 | 32.2  | 0.8     | 1.0     |
| 46 | UO5   | Undiagnosed Overgrowth                       | 1 | 140.5 | 0.7     | 1.1     |
| 47 | ILO5  | Isolated Lateralized Overgrowth              | 1 | 159.9 | 0.8     | 1.6     |
| 48 | BWS11 | Beckwith-Wiedemann                           | 1 | 0.5   |         |         |
| 49 | BWS11 | Beckwith-Wiedemann                           | 2 | 1.1   | 31812.0 | 25568.0 |
| 50 | BWS11 | Beckwith-Wiedemann                           | 3 | 3.4   | 5179.0  | 5521.0  |
| 51 | BWS11 | Beckwith-Wiedemann                           | 4 | 8.5   | 670.0   | 630.0   |

|    |       |                                              |    |       |       |       |
|----|-------|----------------------------------------------|----|-------|-------|-------|
| 52 | BWS11 | Beckwith-Wiedemann                           | 5  | 10.7  | 166.4 | 321.0 |
| 53 | BWS11 | Beckwith-Wiedemann                           | 6  | 12.0  | 26.0  | 37.5  |
| 54 | BWS11 | Beckwith-Wiedemann                           | 7  | 17.8  | 26.0  | 29.4  |
| 55 | BWS11 | Beckwith-Wiedemann                           | 8  | 20.8  | 4.6   | 2.6   |
| 56 | BWS11 | Beckwith-Wiedemann                           | 9  | 24.1  | 4.6   | 5.5   |
| 57 | BWS11 | Beckwith-Wiedemann                           | 10 | 27.7  | 3.2   | 5.5   |
| 58 | BWS12 | Beckwith-Wiedemann                           | 1  | 6.5   |       |       |
| 59 | BWS12 | Beckwith-Wiedemann                           | 2  | 11.1  | 9.5   | 8.3   |
| 60 | BWS12 | Beckwith-Wiedemann                           | 3  | 17.2  | 2.3   | 0.3   |
| 61 | MCM3  | Macrocephaly-Capillary Malformation Syndrome | 1  | 191.0 | 1.0   | 0.2   |
| 62 | BWS13 | Beckwith-Wiedemann                           | 1  | 39.0  | 4.3   | 0.8   |
| 63 | BWS13 | Beckwith-Wiedemann                           | 2  | 48.2  | 2.5   | 2.4   |
| 64 | BWS13 | Beckwith-Wiedemann                           | 3  | 54.6  | 2.5   | 0.4   |
| 65 | BWS14 | Beckwith-Wiedemann                           | 1  | 60.3  | 1.5   | 0.8   |
| 66 | BWS15 | Beckwith-Wiedemann                           | 1  | 7.4   | 24.9  | 15.4  |
| 67 | BWS15 | Beckwith-Wiedemann                           | 2  | 29.5  | 1.7   | 2.3   |
| 68 | ILO6  | Isolated Lateralized Overgrowth              | 1  | 36.6  | 1.9   | 3.2   |
| 69 | ILO6  | Isolated Lateralized Overgrowth              | 2  | 40.5  | 3.8   | 7.3   |
| 70 | BWS16 | Beckwith-Wiedemann                           | 1  | 38.3  | 2.1   | 0.7   |
| 71 | BWS16 | Beckwith-Wiedemann                           | 2  | 44.3  | 0.8   | 0.1   |
| 72 | ILO7  | Isolated Lateralized Overgrowth              | 1  | 6.2   | 43.0  | 41.2  |
| 73 | ILO7  | Isolated Lateralized Overgrowth              | 2  | 10.6  | 9.8   | 9.3   |
| 74 | ILO7  | Isolated Lateralized Overgrowth              | 3  | 15.8  | 3.1   | 3.1   |
| 75 | BWS17 | Beckwith-Wiedemann                           | 1  | 94.6  | 5.8   | 3.3   |
| 76 | BWS17 | Beckwith-Wiedemann                           | 2  | 99.0  | 5.5   | 4.4   |
| 77 | BWS17 | Beckwith-Wiedemann                           | 3  | 102.7 | 3.5   | 0.5   |
| 78 | BWS17 | Beckwith-Wiedemann                           | 4  | 111.3 | 4.3   | 5.8   |
| 79 | BWS17 | Beckwith-Wiedemann                           | 5  | 115.7 | 4.2   | 4.9   |
| 80 | BWS17 | Beckwith-Wiedemann                           | 6  | 106.4 | 3.9   | 0.1   |
| 81 | BWS18 | Beckwith-Wiedemann                           | 1  | 35.5  | 1.1   | 0.3   |
| 82 | BWS18 | Beckwith-Wiedemann                           | 2  | 39.5  | 1.0   | 0.2   |

|     |       |                                 |   |       |       |       |
|-----|-------|---------------------------------|---|-------|-------|-------|
| 83  | BWS18 | Beckwith-Wiedemann              | 3 | 47.6  | 0.9   | 1.3   |
| 84  | BWS18 | Beckwith-Wiedemann              | 4 | 49.4  | 0.8   | 0.8   |
| 85  | BWS19 | Beckwith-Wiedemann              | 1 | 5.6   | 73.0  | 94.5  |
| 86  | BWS19 | Beckwith-Wiedemann              | 2 | 9.3   | 20.0  | 17.2  |
| 87  | BWS19 | Beckwith-Wiedemann              | 3 | 12.5  | 11.4  | 9.8   |
| 88  | BWS19 | Beckwith-Wiedemann              | 4 | 16.0  | 6.2   | 4.3   |
| 89  | BWS19 | Beckwith-Wiedemann              | 5 | 19.5  | 8.6   | 9.2   |
| 90  | BWS19 | Beckwith-Wiedemann              | 6 | 22.8  | 7.9   | 9.6   |
| 91  | ILO8  | Isolated Lateralized Overgrowth | 1 | 91.0  | 2.3   | 0.9   |
| 92  | ILO9  | Isolated Lateralized Overgrowth | 1 | 128.8 | 3.1   | 0.8   |
| 93  | ILO9  | Isolated Lateralized Overgrowth | 2 | 136.2 | 2.9   | 0.5   |
| 94  | UO6   | Undiagnosed Overgrowth          | 1 | 45.7  | 14.2  | 6.2   |
| 95  | BWS20 | Beckwith-Wiedemann              | 1 | 125.1 | 1.2   | 0.2   |
| 96  | BWS21 | Beckwith-Wiedemann              | 1 | 21.8  | 6.1   | 4.6   |
| 97  | BWS22 | Beckwith-Wiedemann              | 1 | 7.2   | 27.0  | 21.5  |
| 98  | BWS22 | Beckwith-Wiedemann              | 2 | 9.0   | 12.0  | 8.3   |
| 99  | BWS22 | Beckwith-Wiedemann              | 3 | 18.6  | 5.2   | 5.2   |
| 100 | BWS23 | Beckwith-Wiedemann              | 1 | 37.1  | 3.9   | 3.2   |
| 101 | BWS23 | Beckwith-Wiedemann              | 2 | 49.7  | 2.8   | 1.0   |
| 102 | BWS23 | Beckwith-Wiedemann              | 3 | 55.4  | 3.4   | 3.3   |
| 103 | BWS24 | Beckwith-Wiedemann              | 1 | 3.0   | 609.0 | 610.5 |
| 104 | BWS25 | Beckwith-Wiedemann              | 1 | 31.6  | 3.2   | 1.1   |
| 105 | BWS25 | Beckwith-Wiedemann              | 2 | 164.1 | 1.3   | 2.0   |
| 106 | BWS26 | Beckwith-Wiedemann              | 1 | 21.2  | 9.1   | 6.8   |
| 107 | BWS26 | Beckwith-Wiedemann              | 2 | 25.6  | 3.1   | 1.6   |
| 108 | BWS26 | Beckwith-Wiedemann              | 3 | 29.6  | 4.9   | 1.6   |
| 109 | BWS26 | Beckwith-Wiedemann              | 4 | 33.5  | 2.2   | 1.2   |
| 110 | BWS26 | Beckwith-Wiedemann              | 5 | 38.9  | 1.6   | 1.0   |
| 111 | BWS26 | Beckwith-Wiedemann              | 6 | 42.3  | 2.3   | 2.1   |
| 112 | BWS27 | Beckwith-Wiedemann              | 1 | 3.9   | 225.0 | 212.0 |
| 113 | BWS28 | Beckwith-Wiedemann              | 1 | 153.4 | 1.5   | 0.4   |

|     |       |                    |   |       |         |         |
|-----|-------|--------------------|---|-------|---------|---------|
| 114 | BWS29 | Beckwith-Wiedemann | 1 | 57.2  | 1.4     | 0.4     |
| 115 | BWS30 | Beckwith-Wiedemann | 1 | 11.5  | 18.5    | 20.0    |
| 116 | BWS30 | Beckwith-Wiedemann | 2 | 13.0  | 7.9     | 6.2     |
| 117 | C1    | Control            | 1 | 8.4   | 7.0     | 1.4     |
| 118 | C2    | Control            | 1 | 226.0 | 2.4     | 0.8     |
| 119 | C3    | Control            | 1 | 6.1   | 27.9    | 33.2    |
| 120 | C4    | Control            | 1 | 150.5 | 2.3     | 0.6     |
| 121 | C5    | Control            | 1 | 148.4 | 1.3     | 0.1     |
| 122 | C5    | Control            | 2 | 148.4 | 2.3     | 0.1     |
| 123 | C6    | Control            | 1 | 5.9   | 51.9    | 64.8    |
| 124 | C7    | Control            | 1 | 174.4 | 1.4     | 0.1     |
| 125 | C8    | Control            | 1 | 65.8  | 1.3     | 0.1     |
| 126 | C9    | Control            | 1 | 30.7  | 2.9     | 0.2     |
| 127 | C10   | Control            | 1 | 28.9  | 2.9     | 0.1     |
| 128 | C10   | Control            | 2 | 31.0  | 2.9     | 2.2     |
| 129 | C11   | Control            | 1 | 149.5 | 1.6     | 0.2     |
| 130 | C12   | Control            | 1 | 38.5  | 0.8     | 0.1     |
| 131 | C13   | Control            | 1 | 85.0  | 0.8     | 0.1     |
| 132 | C14   | Control            | 1 | 3.0   | 44.3    | 35.0    |
| 133 | C15   | Control            | 1 | 11.9  | 2.1     | 0.2     |
| 134 | C16   | Control            | 1 | 9.2   | 33.4    | 24.8    |
| 135 | C17   | Control            | 1 | 8.5   | 6.5     | 5.4     |
| 136 | C18   | Control            | 1 | 55.4  | 2.0     | 0.2     |
| 137 | C19   | Control            | 1 | 162.7 | 0.6     | 0.1     |
| 138 | C20   | Control            | 1 | 166.4 | 2.5     | 0.2     |
| 139 | C21   | Control            | 1 | 6.2   | 19.0    | 26.8    |
| 140 | C22   | Control            | 1 | 0.4   | 21318.0 | 20540.0 |
| 141 | C23   | Control            | 1 | 125.5 | 0.8     | 0.5     |
| 142 | C24   | Control            | 1 | 109.0 | 1.4     | 2.0     |
| 143 | C25   | Control            | 1 | 8.9   | 14.3    | 35.0    |
| 144 | C26   | Control            | 1 | 36.9  | 2.6     | 1.3     |

|     |     |         |   |       |        |        |
|-----|-----|---------|---|-------|--------|--------|
| 145 | C27 | Control | 1 | 0.8   | 741.0  | 648.0  |
| 146 | C28 | Control | 1 | 0.8   | 3386.0 | 3110.0 |
| 147 | C28 | Control | 2 | 16.4  | 21.9   | 16.8   |
| 148 | C29 | Control | 1 | 43.0  | 2.5    | 0.7    |
| 149 | C30 | Control | 1 | 96.4  | 0.5    | 0.1    |
| 150 | C31 | Control | 1 | 23.9  | 2.6    | 2.5    |
| 151 | C32 | Control | 1 | 22.8  | 1.7    | 0.2    |
| 152 | C33 | Control | 1 | 170.1 | 1.5    | 0.1    |
| 153 | C34 | Control | 1 | 93.0  | 1.2    | 0.1    |
| 154 | C34 | Control | 2 | 4.3   | 182.0  | 179.0  |
| 155 | C35 | Control | 1 | 8.9   | 7.9    | 3.8    |
| 156 | C36 | Control | 1 | 296.3 | 3.1    | 1.1    |
| 157 | C37 | Control | 1 | 103.6 | 1.4    | 0.4    |
| 158 | C38 | Control | 1 | 180.0 | 1.5    | 0.1    |
| 159 | C39 | Control | 1 | 6.5   | 16.0   | 19.2   |
| 160 | C40 | Control | 1 | 9.5   | 9.8    | 4.1    |
| 161 | C41 | Control | 1 | 9.7   | 19.3   | 21.3   |
| 162 | C42 | Control | 1 | 180.4 | 2.4    | 0.2    |
| 163 | C43 | Control | 1 | 9.1   | 23.0   | 20.4   |
| 164 | C44 | Control | 1 | 24.5  | 2.8    | 1.8    |
| 165 | C44 | Control | 2 | 30.0  | 0.9    | 0.7    |
| 166 | C45 | Control | 1 | 22.3  | 9.1    | 2.1    |
| 167 | C46 | Control | 1 | 32.6  | 1.4    | 0.5    |
| 168 | C47 | Control | 1 | 101.8 | 2.2    | 0.3    |
| 169 | C48 | Control | 1 | 164.6 | 1.6    | 0.1    |
| 170 | C49 | Control | 1 | 225.9 | 1.6    | 0.1    |
| 171 | C50 | Control | 1 | 2.4   | 202.0  | 198.0  |
| 172 | C50 | Control | 2 | 14.9  | 4.7    | 0.1    |
| 173 | C51 | Control | 1 | 157.1 | 0.8    | 2.1    |
| 174 | C51 | Control | 2 | 159.1 | 1.0    | 1.6    |
| 175 | C52 | Control | 1 | 20.5  | 6.9    | 7.3    |

|     |     |         |   |       |      |      |
|-----|-----|---------|---|-------|------|------|
| 176 | C52 | Control | 2 | 20.8  | 3.5  | 2.5  |
| 177 | C53 | Control | 1 | 21.8  | 5.3  | 5.2  |
| 178 | C54 | Control | 1 | 22.9  | 2.6  | 2.4  |
| 179 | C55 | Control | 1 | 49.6  | 0.9  | 0.7  |
| 180 | C56 | Control | 1 | 179.2 | 1.8  | 2.5  |
| 181 | C57 | Control | 1 | 132.0 | 2.2  | 0.2  |
| 182 | C58 | Control | 1 | 109.9 | 2.7  | 0.5  |
| 183 | C59 | Control | 1 | 157.5 | 2.0  | 0.6  |
| 184 | C60 | Control | 1 | 103.3 | 1.8  | 0.5  |
| 185 | C61 | Control | 1 | 16.7  | 3.1  | 1.3  |
| 186 | C61 | Control | 2 | 18.0  | 3.2  | 1.3  |
| 187 | C62 | Control | 1 | 18.1  | 9.5  | 8.8  |
| 188 | C63 | Control | 1 | 192.6 | 3.7  | 3.2  |
| 189 | C64 | Control | 1 | 15.2  | 5.2  | 6.3  |
| 190 | C64 | Control | 2 | 19.4  | 12.2 | 6.7  |
| 191 | C65 | Control | 1 | 91.5  | 2.0  | 0.1  |
| 192 | C66 | Control | 1 | 98.3  | 0.3  | 0.1  |
| 193 | C67 | Control | 1 | 124.0 | 0.9  | 0.1  |
| 194 | C68 | Control | 1 | 16.3  | 2.1  | 0.3  |
| 195 | C68 | Control | 2 | 3.5   | 98.0 | 75.0 |
| 196 | C69 | Control | 1 | 1.9   | 79.0 | 43.5 |
| 197 | C69 | Control | 2 | 2.7   | 79.0 | 64.4 |
| 198 | C70 | Control | 1 | 3.8   | 90.0 | 66.5 |
| 199 | C71 | Control | 1 | 10.2  | 11.0 | 10.0 |
| 200 | C72 | Control | 1 | 16.7  | 7.9  | 1.9  |
| 201 | C73 | Control | 1 | 99.6  | 2.4  | 0.2  |
| 202 | C74 | Control | 1 | 14.0  | 23.4 | 25.6 |
| 203 | C75 | Control | 1 | 3.1   |      |      |
| 204 | C75 | Control | 2 | 8.1   | 9.4  | 5.9  |
| 205 | C76 | Control | 1 | 151.9 | 6.6  | 0.7  |
| 206 | C77 | Control | 1 | 7.1   | 8.6  | 8.5  |

|     |      |         |   |       |       |       |
|-----|------|---------|---|-------|-------|-------|
| 207 | C77  | Control | 2 | 8.9   | 6.2   | 0.6   |
| 208 | C78  | Control | 1 | 2.7   | 182.0 | 245.0 |
| 209 | C79  | Control | 1 | 9.2   | 21.3  | 13.2  |
| 210 | C79  | Control | 2 | 18.9  | 5.6   | 3.8   |
| 211 | C80  | Control | 1 | 171.6 | 3.1   | 0.1   |
| 212 | C81  | Control | 1 | 161.1 | 4.8   | 0.2   |
| 213 | C81  | Control | 1 | 220.1 | 1.2   | 0.4   |
| 214 | C83  | Control | 1 | 252.1 | 2.1   | 0.3   |
| 215 | C84  | Control | 1 | 19.2  | 5.3   | 6.2   |
| 216 | C84  | Control | 2 | 30.6  | 3.0   | 2.1   |
| 217 | C85  | Control | 1 | 29.5  | 3.2   | 0.1   |
| 218 | C86  | Control | 1 | 29.9  | 3.1   | 1.0   |
| 219 | C87  | Control | 1 | 146.9 | 2.0   | 0.1   |
| 220 | C88  | Control | 1 | 98.9  | 2.1   | 0.8   |
| 221 | C89  | Control | 1 | 41.1  | 4.5   | 3.5   |
| 222 | C90  | Control | 1 | 23.9  | 1.2   | 0.2   |
| 223 | C91  | Control | 1 | 149.3 | 1.7   | 0.1   |
| 224 | C92  | Control | 1 | 0.9   | 6.2   | 2.9   |
| 225 | C93  | Control | 1 | 66.7  | 2.1   | 0.1   |
| 226 | C94  | Control | 1 | 156.7 | 1.1   | 0.4   |
| 227 | C95  | Control | 1 | 8.8   | 10.0  | 5.5   |
| 228 | C96  | Control | 1 | 15.9  | 3.2   | 0.1   |
| 229 | C97  | Control | 1 | 104.5 | 1.0   | 0.1   |
| 230 | C98  | Control | 1 | 89.0  | 2.8   | 0.9   |
| 231 | C99  | Control | 1 | 31.3  | 2.4   | 0.1   |
| 232 | C100 | Control | 1 | 16.7  | 1.5   | 0.3   |
| 233 | C101 | Control | 1 | 3.2   | 9.9   | 14.3  |
| 234 | C101 | Control | 2 | 14.1  | 4.1   | 2.7   |
| 235 | C102 | Control | 1 | 130.5 | 2.1   | 0.1   |
| 236 | C103 | Control | 1 | 117.9 | 1.6   | 0.2   |
| 237 | C104 | Control | 1 | 102.7 | 1.5   | 0.1   |



|     |      |         |   |       |       |       |
|-----|------|---------|---|-------|-------|-------|
| 238 | C105 | Control | 1 | 30.3  | 1.7   | 0.1   |
| 239 | C105 | Control | 2 | 31.2  | 1.4   | 1.6   |
| 240 | C106 | Control | 1 | 66.5  | 2.1   | 2.1   |
| 241 | C107 | Control | 1 | 228.5 | 2.1   | 0.3   |
| 242 | C108 | Control | 1 | 174.3 | 2.3   | 2.4   |
| 243 | C108 | Control | 2 | 181.7 | 2.3   | 0.2   |
| 244 | C109 | Control | 1 | 109.6 | 2.1   | 0.8   |
| 245 | C110 | Control | 1 | 94.3  | 1.1   | 1.5   |
| 246 | C111 | Control | 1 | 96.6  | 1.0   | 1.6   |
| 247 | C112 | Control | 1 | 4.5   | 186.0 | 178.0 |
| 248 | C113 | Control | 1 | 10.0  | 7.2   | 5.1   |
| 249 | C114 | Control | 1 | 13.6  | 10.5  | 14.5  |
| 250 | C114 | Control | 2 | 17.3  | 4.3   | 5.5   |
| 251 | C115 | Control | 1 | 29.0  | 5.6   | 1.5   |
| 252 | C116 | Control | 1 | 52.4  | 0.8   | 0.1   |
| 253 | C117 | Control | 1 | 151.7 | 5.1   | 6.8   |
| 254 | C118 | Control | 1 | 91.8  | 0.9   | 0.2   |
| 255 | C119 | Control | 1 | 29.8  | 1.3   | 0.5   |
| 256 | C120 | Control | 1 | 70.2  | 0.5   | 3.1   |
| 257 | C121 | Control | 1 | 57.1  | 1.5   | 2.7   |
| 258 | C122 | Control | 1 | 142.7 | 1.5   | 0.5   |
| 259 | C123 | Control | 1 | 27.5  | 1.0   | 0.2   |
